# Supplementary material for: A Quantitative Evaluation of the Performance of the Low-Cost AudioMoth Acoustic Recording Unit
Source: MDPI journal article supplement (doi:10.3390/s23115254), 2023-06-01
Supplement: s1 [file s1]

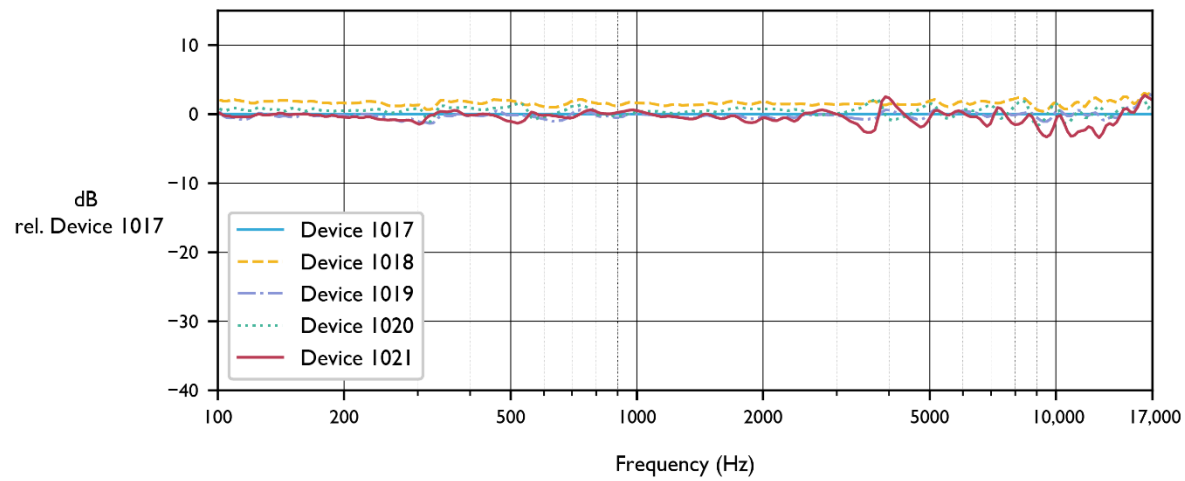

**Figure S1.** Frequency response variation between five AudioMoth devices without cases relative to Device 1017.

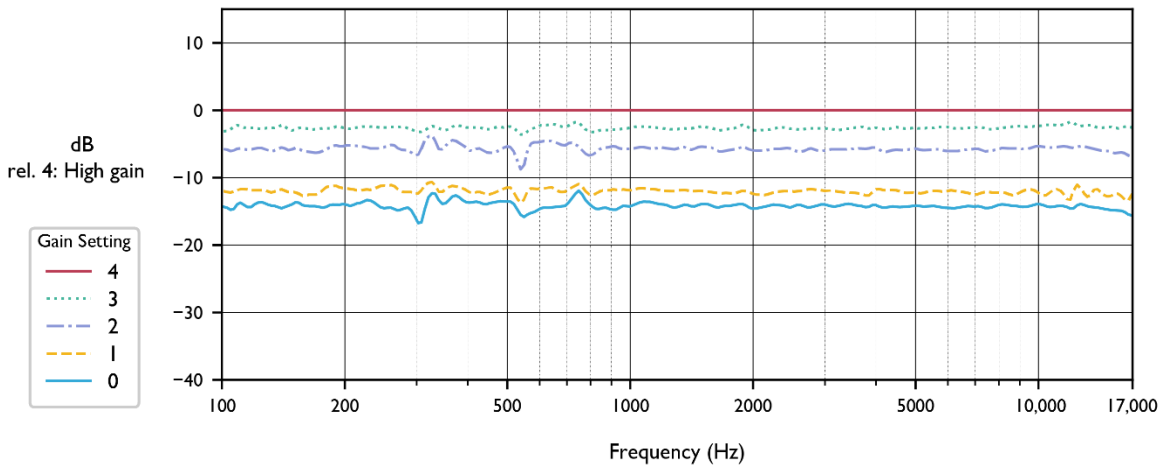

**Figure S2.** Frequency response for pink noise recorded at the 5 gain settings, relative to the highest gain setting.

**Table S1.** On-axis frequency response in each housing treatment, dB relative to “A: No Case” at 1kHz = 0dB

| Treatment     | 100 Hz | 200 Hz | 500 Hz | 1 kHz | 2 kHz | 5 kHz | 10 kHz | 15kHz |
|---------------|--------|--------|--------|-------|-------|-------|--------|-------|
| A: No Case    | -3     | 0      | 0      | 0     | 2     | 7     | 5      | 8     |
| B: Vacuum Bag | -6     | -1     | 0      | 1     | 1     | 5     | 2      | -4    |
| C: Zip Lock   | 0      | -4     | -3     | -4    | -1    | 9     | 1      | -15   |

**Table S2.** Individual results and overall average for the effect of sample rate on battery life.

| Sample Rate (kHz) | AudioMoth 1 Hours of Audio | AudioMoth 2 Hours of Audio | AudioMoth 3 Hours of Audio | Average Hours of Audio |
|-------------------|----------------------------|----------------------------|----------------------------|------------------------|
| 8                 | 247                        | 249                        | 251                        | 249                    |
| 16                | 224                        | 225                        | 225                        | 224                    |
| 32                | 187                        | 191                        | 188                        | 189                    |
| 48                | 163                        | 161                        | 160                        | 161                    |
| 96 <sup>1</sup>   | 90                         | 91                         | 91                         | 91                     |

|                  |    |    |    |    |
|------------------|----|----|----|----|
| 192 <sup>1</sup> | 61 | 59 | 61 | 60 |
| 250 <sup>1</sup> | 47 | 47 | 47 | 47 |
| 384 <sup>1</sup> | 43 | 43 | 43 | 43 |

<sup>1</sup> Audio files at these sample rates filled the SD card before the batteries depleted, and required a second SD card to be inserted once the red and green LEDs began flashing.

**Table S3.** Individual results and overall average for the effect of gain setting on battery life.

| Gain Setting | AudioMoth 1<br>Hours of Audio | AudioMoth 2<br>Hours of Audio | AudioMoth 3<br>Hours of Audio | Average<br>Hours of Audio |
|--------------|-------------------------------|-------------------------------|-------------------------------|---------------------------|
| Low          | 186                           | 190                           | 187                           | 188                       |
| Low-medium   | 187                           | 188                           | 190                           | 188                       |
| Medium       | 187                           | 191                           | 188                           | 189                       |
| Medium-high  | 187                           | 186                           | 186                           | 186                       |
| High         | 187                           | 191                           | 187                           | 188                       |

**Table S4.** Individual results and overall average for the effect of temperature on Procell alkaline battery life.

| Temperature          | AudioMoth 1<br>Hours of Audio | AudioMoth 2<br>Hours of Audio | AudioMoth 3<br>Hours of Audio | Average<br>Hours of Audio |
|----------------------|-------------------------------|-------------------------------|-------------------------------|---------------------------|
| Room (20.5°C)        | 187                           | 191                           | 188                           | 189                       |
| Fridge (3.4°C)       | 184                           | 181                           | 185                           | 183                       |
| Freezer<br>(-16.1°C) | 105                           | 103                           | 99                            | 102                       |

**Table S5.** Individual results and overall average for the effect of temperature on Energizer lithium battery life.

| Temperature          | AudioMoth 1<br>Hours of Audio | AudioMoth 2<br>Hours of Audio | AudioMoth 3<br>Hours of Audio | Average<br>Hours of Audio |
|----------------------|-------------------------------|-------------------------------|-------------------------------|---------------------------|
| Room (20.5°C)        | 228                           | 236                           | 239                           | 234                       |
| Fridge (3.4°C)       | 244                           | 239                           | 241                           | 241                       |
| Freezer<br>(-16.1°C) | 241                           | 236                           | 237                           | 238                       |
